# Supplementary material for: Glutamate neurotransmission from leptin receptor cells is required for typical puberty and reproductive function in female mice
Source: eLife. 2024 Jul 15;13:RP93204. doi: 10.7554/eLife.93204 (PMC11249761; doi:10.7554/eLife.93204)
Supplement: Source data 1. [file elife-93204-data1.xlsx]

## Sheet: Sheet1
LH levels Time (min)	LKG516	LKG517	LKG522	LKG523	LKG534	LKG535	LKG537	LKG441	LKG442	LKG445	LKG446	LKG447	LKG452	LKG161	LKG166	LKG170	LKG177	LKG198	LKG199	LKG203	LKG200	LKG202	LC01	LC02	LC06	LC07	LC09	LC14	LC15	TO044	TO155	TO632	TO452	TO453
-30	0.443	0	0	0.11	0.245	0.161	0	0.186	0.105	0.382	0.13	0.091	1.015	0	1.79	0	0.97	0.183	0	0.167	0	0.399	0.133	0.126	0.072	0.074	0.082	0.069	0.067	0.177	0.341	0.179	0.303	0.553
-20	0.258	0	0.542	0.196	0.235	0.167	0	1.001	0.03	0.235	0.133	0.105	0.406	0	0.755	0.188	0.745	0	0	0.191	0	0.179	0.138	0.11	0.073	0.092	0.081	0.059	0.072	0.281	2.116	0.485	0.888	0.383
-10	0.213	0	0	0.152	0.203	2.663	0	0.55	0	0.179	0.112	0.102	0.203	0	0.324	0	0.719	0	0	0.249	0	0	0.155	0.116	0.072	0.058	0.077	0.063	0.094	0.231	1.063	2.784	0.562	0.345
0	0.143	0	0.068	2.675	0.206	1.189	0	0.326	0	0.158	0.102	0.088	0.137										0.156	0.126	0.079	0.083	0.078	0.061	0.083	0.216	0.728	1.311	0.395	0.309
10	0.104	1.943	0	1.202	0.187	0.696	0.061	0.172	1.075	1.18	1.176	0.098	0.868	2.28	1.459	0	3.113	2.367	0	0.546	0.573	0	0.143	0.141	0.558	0.336	0.131	0	0.076	0.189	0.602	0.635	0.352	0.281
20	0.066	0.756	0	0.708	2.076	0.709	0	0.809	0.644	0.7	0.76	1.386	0.452	1.91	2.372	0	2.155	1.681	0	0.884	0.245	0	0.151	0.221	0.642	1.027	0.449	0.097	0.104	0.198	0.483	0.481	0.313	0.254
30	0.102	0.521	0	0.474	1.109	0.311	0.504	1.071	0.357	0.424	0.543	0.585	0.336	1.145	3.002	0	1.852	1.98	0	0.736	0.167	0	0.189	0.179	0.49	0.728	0.356	0.067	0.123	0.211	0.368	0.361	0.934	0.207
40	0.183	0.277	0	0.313	0.638	0.265	0.145	0.483	0.224	0.294	0.371	0.277	0.28	0.693	1.558	0	1.618	1.093	0	0.5	0	0	0.136	0.159	0.327	0.387	0.276	0.058	0.101	0.225	0.46	0.319	0.613	0.266
50	0.121	0.148	0	0.248	0.52	0.212	0.073	0.399	0.2	0.21	0.343	0.196	0.294	0.552	2.246	0	1.057	0.683	0	1.063	0	0	0.116	0.162	0.274	0.304	0.401	0.063	0.097	0.296	0.441	0.223	0.473	0.241
60	0.105	0.096	0	0.43	0.343	0.159	0	0.466	0.175	0.291	0.326	0.158	0.207	0.382	0.954	0	1.1	0.607	0	0.598	0	0	0.13	0.141	0.223	0.204	0.242	0.063	0.103	0.217	0.331	0.298	0.412	0.228
Group	Clozapine no AAV	Clozapine no AAV	Clozapine no AAV	Clozapine no AAV	Clozapine no AAV	Clozapine no AAV	Clozapine no AAV	“PMv-Hit” with LH increase	Clozapine hM3Dq	Clozapine hM3Dq	Clozapine hM3Dq	Excluded	Clozapine hM3Dq	“PMv-Hit” with LH increase	“PMv-Hit” with LH increase	“PMv-Hit” with no LH increase	“PMv-Hit” with LH increase	“PMv-Hit” with LH increase	“PMv-Hit” with no LH increase	“PMv-Hit” with LH increase	Negative controls	Negative controls	“PMv-Hit” with no LH increase	“PMv-Hit” with no LH increase	“PMv-Hit” with LH increase	“PMv-Hit” with LH increase	“PMv-Hit” with no LH increase	“PMv-Hit” with no LH increase	“PMv-Hit” with no LH increase	Negative controls	Negative controls	Negative controls	Negative controls	Negative controls
AAV vector	No AAV	No AAV	No AAV	No AAV	No AAV	No AAV	No AAV	AAV-hM3Dq	AAV-hM3Dq	AAV-hM3Dq	AAV-hM3Dq	AAV-hM3Dq	AAV-hM3Dq	AAV-hM3Dq	AAV-hM3Dq	AAV-hM3Dq	AAV-hM3Dq	AAV-hM3Dq	AAV-hM3Dq	AAV-hM3Dq	AAV-hM3Dq	AAV-hM3Dq	AAV-hM3Dq	AAV-hM3Dq	AAV-hM3Dq	AAV-hM3Dq	AAV-hM3Dq	AAV-hM3Dq	AAV-hM3Dq	AAV-mCherry	AAV-mCherry	AAV-mCherry	AAV-mCherry	AAV-mCherry
Drug	Clozapine	Clozapine	Clozapine	Clozapine	Clozapine	Clozapine	Clozapine	CNO	Clozapine	Clozapine	Clozapine	CNO	Clozapine	CNO	CNO	CNO	CNO	CNO	CNO	CNO	CNO	CNO	CNO	CNO	CNO	CNO	CNO	CNO	CNO	CNO	CNO	CNO	CNO	CNO
PMv-hit	N/A	N/A	N/A	N/A	N/A	N/A	N/A	Yes	Yes	Yes	Yes	Yes (very small)	Yes	Yes	Yes	Yes	Yes	Yes	Yes	Yes	No	No	Yes	Yes	Yes	Yes	Yes	Yes	Yes	Yes	Yes	Yes	Yes	Yes
LH Peak (10 - 20 min)	No	Yes	No	No	Yes	No	No	Yes	Yes	Yes	Yes	Yes	Yes	Yes	Yes	No	Yes	Yes	No	Yes	No	No	No	No	Yes	Yes	No	No	No	No	No	No	No	No
AUC (-10 to 20)	0	32.93	0	18.53	9.286	0	0.915	0.5265	19.35	17.62	19.2		11.22	43.75	27.27	0	43.09	43.91	0	7.63	9.82	0	0	0.9	10.14	9.015	2.67	0.05959	0.01786	0	0	0	0	0
Fos PMv	4	6	2.5	1.5	4	2	4	173	242	277	199	28	217*	199	108	76	259	144	45	147	8	27	86	133	149	211	104	100	65	0	3	2	0	1
Fos Arc	N/A	N/A	N/A	N/A	N/A	N/A	N/A	82.3333	N/A	N/A	N/A		N/A	154.333	64	28.5	119.333	160.667	18.5	57	4.66667	11	81.6667	226	151.667	178.667	144.667	142.667	155.333	1	3.33333	1.33333	6	0.666667
Fos-mCherry Arc	N/A	N/A	N/A	N/A	N/A	N/A	N/A	40	N/A	N/A	N/A		N/A	111	33	2.5	76.6667	114.333	1.5	30.5	0	0	7	90.3333	50.3333	81	50.3333	47	52	0	0.666667	0.666667	1.33333	0
													*Section broken
